# Supplementary material
Source: PubMed Central journal article supplement (PMC2943753)
Supplement: blood-2008-04-151860_1.pdf [file blood-2008-04-151860_1.pdf]

| Therapy    | Age group | CD20 negative |         | CD20 positive |         | P-value |
|------------|-----------|---------------|---------|---------------|---------|---------|
|            |           | %PS 0-1       | %PS 2-3 | %PS 0-1       | %PS 2-3 |         |
| Hyper-CVAD | ≤ 30      | 80            | 20      | 68            | 32      | NS      |
|            | 31-59     | 79            | 21      | 59            | 41      | .07     |
|            | ≥ 60      | 58            | 42      | 74            | 31      | NS      |
| VAD/CVAD   | ≤ 30      | 100           | —       | 80            | 20      | .03     |
|            | 31-59     | 100           | —       | 77            | 23      | .03     |
|            | ≥ 60      | 67            | 33      | 63            | 37      | NS      |
